# Supplementary material for: Crystallization pathway from a highly viscous colloidal suspension to ultra-small FAU zeolite nanocrystals
Source: Royal Society of Chemistry journal article supplement (doi:10.1039/d1ta02781f), 2021-01-01
Supplement: d1ta02781f1.pdf [file d1ta02781f1.pdf]

## Supporting Information

### Crystallization pathway from highly viscous colloidal suspension to ultra-small FAU zeolite nanocrystals

Hussein Awala,<sup>1</sup> Shrikant M. Kunjir,<sup>1</sup> Aurélie Vicente,<sup>1</sup> Jean-Pierre Gilson,<sup>1</sup> Valentin Valtchev,<sup>1</sup> Hussein Seblani,<sup>1</sup> Richard Retoux,<sup>2</sup> Louwanda Lakiss,<sup>1</sup> Christian Fernandez,<sup>1</sup> Robert Bedard,<sup>3</sup> Suheil Abdo,<sup>3</sup> Jeffery Bricker,<sup>3</sup> Svetlana Mintova<sup>1\*</sup>

<sup>1</sup> Normandie Université, ENSICAEN, UNICAEN, CNRS, LCS, 14000 Caen, France

<sup>2</sup> Normandie Université, ENSICAEN, UNICAEN, CNRS, CRISMAT, 14000 Caen, France

<sup>3</sup> UOP-Honeywell LLC, R&D, 25 East Algonquin Road, Des Plaines, IL 60016, USA

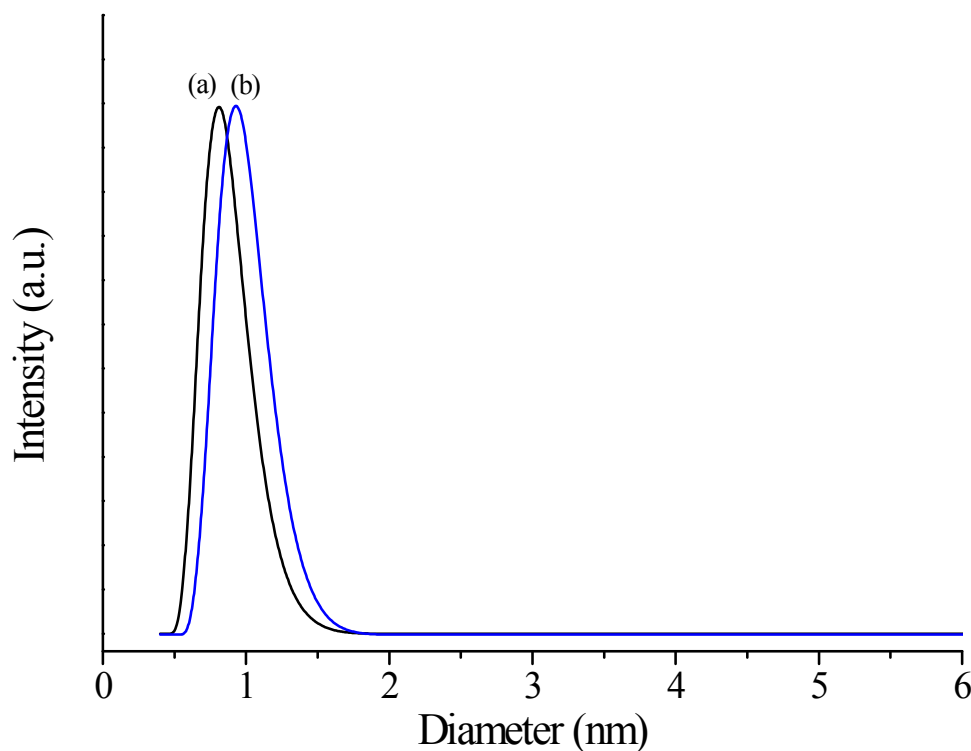

**Figure S1.** Dynamic light scattering (DLS) particle size distribution curves of (a) *solution A* (sodium aluminate) and (b) *solution B* (sodium silicate) used to prepare the nano FAU-type zeolite

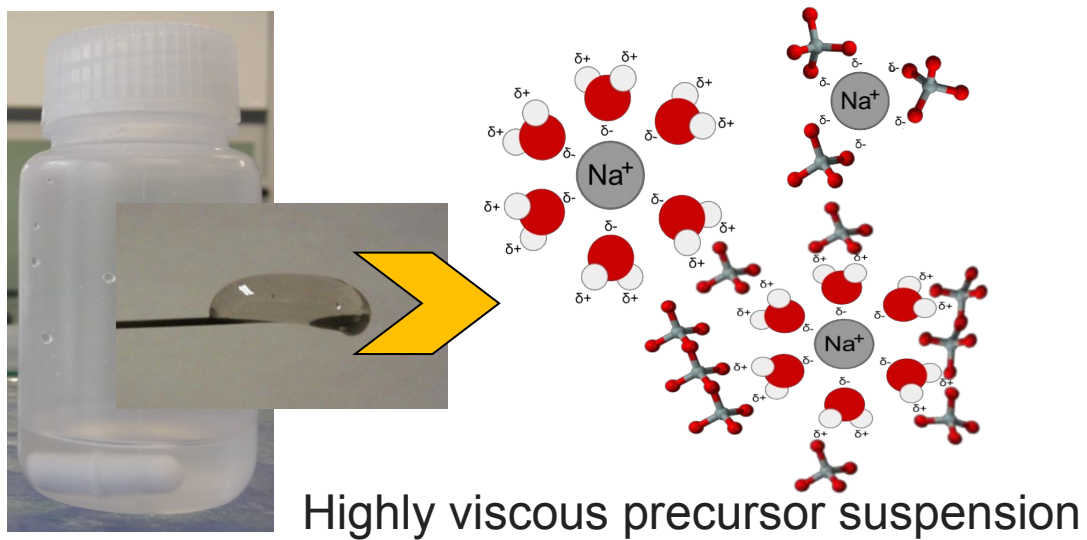

**Figure S2.** Highly viscous and transparent suspension at step 3 (P-3).

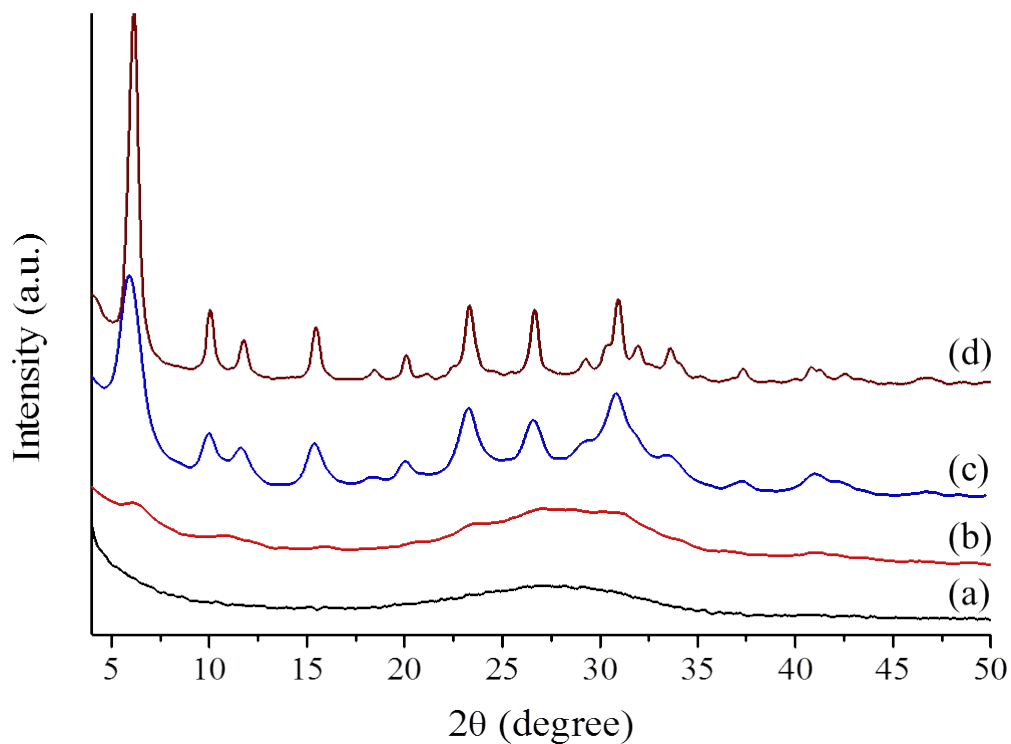

**Figure S3.** XRD patterns of (a) P-3, (b) FAU -45 min, (c) FAU-3 h and (d) FAU-24 h.

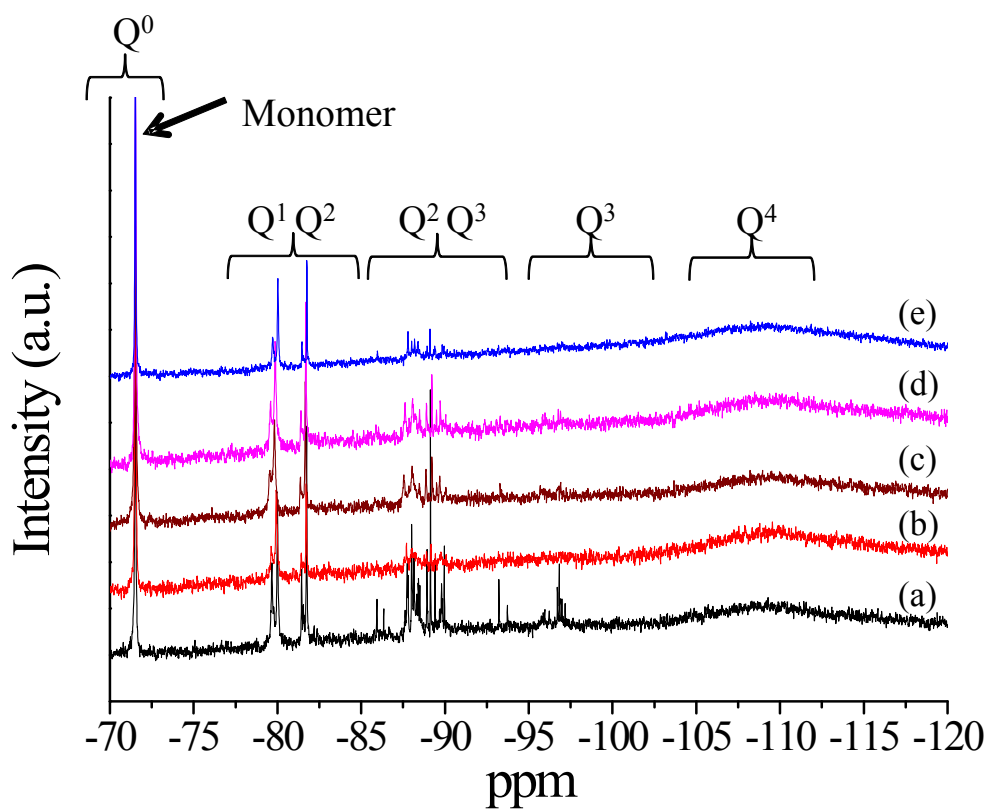

**Figure S4.**  $^{29}\text{Si}$  liquid NMR spectra of (a) solution B, (b) P-1, (c) P-2, (d) P-3, and (e) FAU-45 min.

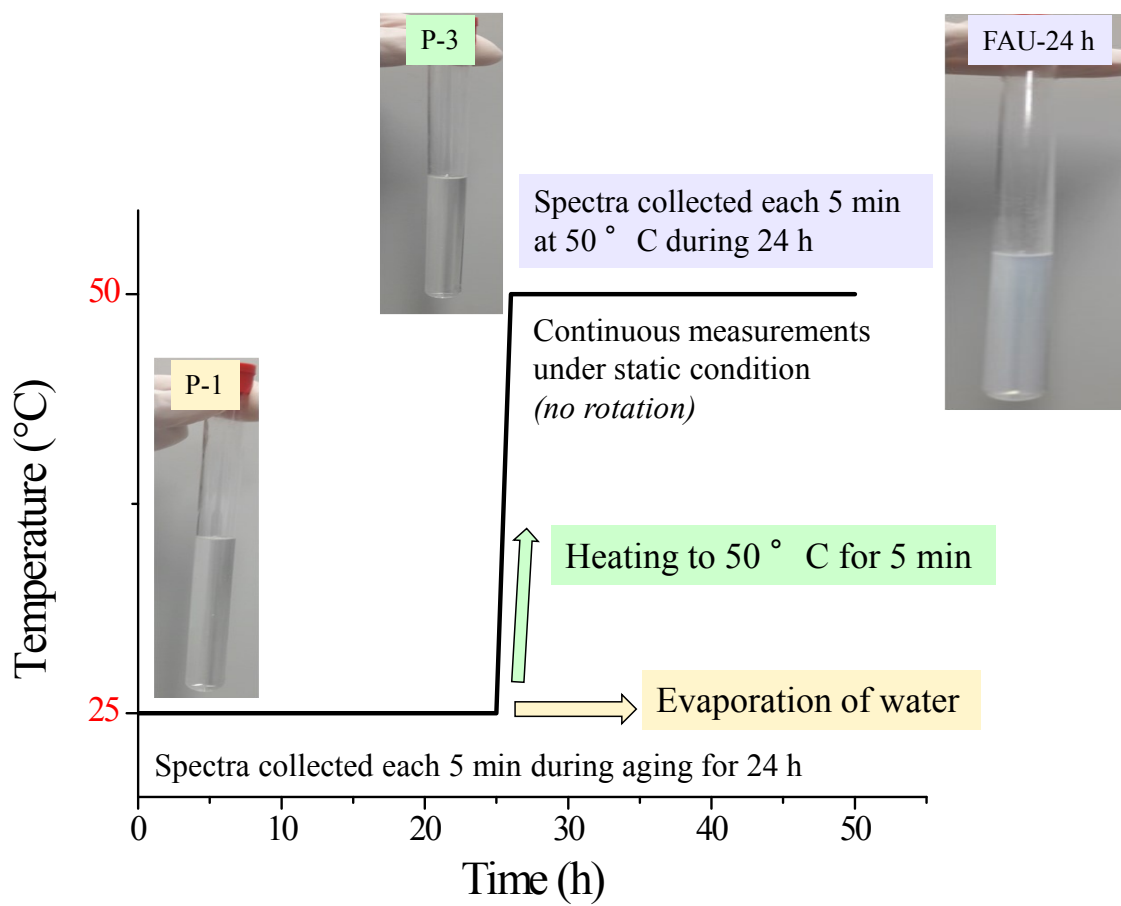

**Figure S5.** *In-situ*  $^{29}\text{Si}$  NMR experiments as a function of time and temperature (10 mm glass NMR tube used) during FAU crystallization.

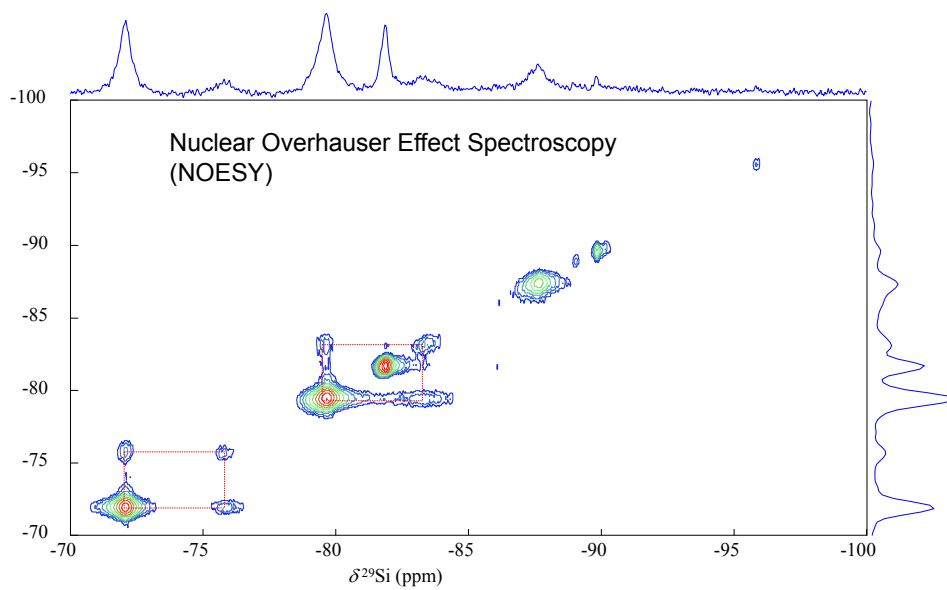

**Figure S6.** Nuclear Overhauser Effect Spectroscopy (NOESY) spectra on P-2 (NOE mixing time: 20 msec, Scans: 64, and Total number of points TD1: 256)

**Table S1.** Silicate species identified by liquid-state  $^{29}\text{Si}$  MAS NMR spectroscopy in P-1.

| Species                                                                                                                                         | Chemical Shift (ppm) |
|-------------------------------------------------------------------------------------------------------------------------------------------------|----------------------|
| Monomer                                                                                                                                         | -71.05               |
| Dimer                                                                                                                                           | -79.80               |
| Linear Trimer                                                                                                                                   | -89.50               |
| Cyclic Trimer                                                                                                                                   | -81.20               |
| Substituted Cyclic Trimer (Q <sup>1</sup> ), Substituted Cyclic Tetramer (Q <sup>1</sup> )                                                      | -79.30               |
| Substituted Cyclic Trimer (Q <sup>2</sup> )                                                                                                     | -80.90               |
| Substituted Cyclic Trimer (Q <sup>3</sup> ), Substituted Cyclic Tetramer (Q <sup>3</sup> ), Tricyclic Hexamer (Q <sup>2</sup> /Q <sup>3</sup> ) | -89.50               |
| Cyclic Tetramer                                                                                                                                 | -87.70               |
| Bicyclic Pentamer (Q <sup>2</sup> )                                                                                                             | 81.30                |
| Bicyclic Pentamer (Q <sup>3</sup> )                                                                                                             | 88.10; 88.60         |
| Prismatic Hexamer                                                                                                                               | -88.0                |
| Tricyclic Hexamer, Substituted Cyclic Tetramer (Q <sup>3</sup> )                                                                                | -97.0                |
| Tetrahedral Tetramer                                                                                                                            | -97.70               |
| Prismatic Tetramer                                                                                                                              | -98.11               |
| Doubly Bridged Cyclic Tetramer (Q <sup>2</sup> )                                                                                                | 86.10                |
| Doubly Bridged Cyclic Tetramer (Q <sup>3</sup> )                                                                                                | 92.8                 |
| Double 4-ring                                                                                                                                   | -98.99               |
| Double 5-ring                                                                                                                                   | 98.40                |
| Double 6-ring                                                                                                                                   | -97.80               |
| Pentacyclic Dodecamer (Q <sup>2</sup> )                                                                                                         | 89.0                 |
| Pentacyclic Dodecamer (Q <sup>3</sup> )                                                                                                         | 96.20; 96.60         |

**Table S2.** Degree of crystallinity and Si/Al ratio calculated from solid-state  $^{29}\text{Si}$  NMR.

| <b>Sample</b> | <b>Degree of crystallinity (%)</b> | <b>Si/Al ratio</b> |
|---------------|------------------------------------|--------------------|
| P-1           | 0                                  | -----              |
| P-2           | 10-16                              | -----              |
| P-3           | 23                                 | 2.8                |
| FAU-45 min    | 36                                 | 1.7                |
| FAU-3 h       | 50                                 | 1.41               |
| FAU-24 h      | 100                                | 1.06               |
